# Supplementary material for: Longevity of size-dependent particle removal performance of do-it-yourself box fan air filters
Source: Royal Society of Chemistry journal article supplement (doi:10.1039/d4em00406j), 2024-10-24
Supplement: d4em00406j1.pdf [file d4em00406j1.pdf]

## Supplementary Information

### Conversion of OPC Measurement to APS-Equivalent Values

The APS measures particle concentrations in 52 bins for particle aerodynamic diameters of ~0.5 to 20  $\mu\text{m}$ , and the OPC measures particle concentrations in 24 bins for particle optical diameters of 0.35 to 40  $\mu\text{m}$ . Salt particle concentrations generated by the nebulizer were negligible above 3  $\mu\text{m}$  optical diameter. Therefore, evaluation of the CR box performance was limited to particles with optical diameters of 0.35 to 3  $\mu\text{m}$ , which covers the primary range of interest for air cleaners due to the known health impacts of particles in this size range.

The APS particle size bins were converted from aerodynamic diameter to mobility diameter using Equation 1:

$$D_m = \left(\frac{\rho_o}{\rho_p}\right)^{0.5} D_a \quad (1)$$

Where  $D_m$  is the mobility diameter for a theoretical spherical particle,  $\rho_o$  is the density of water (1  $\text{g}/\text{cm}^3$ ),  $\rho_p$  is the density of the particle (2  $\text{g}/\text{cm}^3$  for NaCl), and  $D_a$  is the aerodynamic diameter as measured by the APS. After the APS particle diameter bins were converted to mobility diameter using Equation 1, they were aligned with the corresponding OPC optical diameter bins (which assumes that the particles are spherical). The particle concentrations for the matched bins were then correlated using the available data from the first round of testing with both instruments. A cubic equation was fit to correlate each OPC to the APS data for each particle size bin "j", with the following empirical form:

$$APS_{(j)} = a1_{(j)}OPC_{(j)} + a2_{(j)}OPC_{(j)}^2 + a3_{(j)}OPC_{(j)}^3 \quad (2)$$

Where OPC and APS are the respective measured particle concentrations in particles per cubic centimetre. The coefficients for Equation 2 for each bin are listed in Table S1. The data used to determine each correlation for Table S1 is shown in Figure S1 and S2.

Table S1: APS and OPC particle diameter bins and coefficients for cubic OPC and APS correlation

| Bin (j) | APS Mobility Diameter ( $\mu\text{m}$ ) | OPC Optical Diameter ( $\mu\text{m}$ ) | Coefficients for OPC-1, Eq 2 |                               |                                 | Coefficients for OPC-2, Eq 2 |                               |                                 |
|---------|-----------------------------------------|----------------------------------------|------------------------------|-------------------------------|---------------------------------|------------------------------|-------------------------------|---------------------------------|
|         |                                         |                                        | a1 (-)                       | a2 ( $\text{cm}^3/\text{p}$ ) | a2 ( $\text{cm}^6/\text{p}^3$ ) | a1 (-)                       | a2 ( $\text{cm}^3/\text{p}$ ) | a2 ( $\text{cm}^6/\text{p}^3$ ) |
| 0       | $\leq 0.46$                             | 0.35 – 0.46                            | 2.97E+00                     | -1.08E-01                     | 4.33E-03                        | 2.76E+00                     | -8.77E-02                     | 3.79E-03                        |
| 1       | 0.46 – 0.66                             | 0.46 – 0.66                            | 2.23E+00                     | 1.72E-03                      | 4.10E-04                        | 2.27E+00                     | 3.74E-03                      | 4.14E-04                        |
| 2       | 0.66 – 1.03                             | 0.66 – 1.0                             | 3.31E+00                     | 5.74E-03                      | 3.55E-04                        | 3.22E+00                     | 1.49E-02                      | 1.98E-04                        |
| 3       | 1.03 – 1.28                             | 1.0 – 1.3                              | 2.52E+00                     | 3.49E-02                      | -9.06E-04                       | 2.61E+00                     | 2.86E-02                      | -8.04E-04                       |
| 4       | 1.28 – 1.72                             | 1.3 – 1.7                              | 1.49E+00                     | -1.24E-03                     | -1.50E-04                       | 1.50E+00                     | -1.99E-03                     | -1.19E-04                       |
| 5       | 1.72 – 2.30                             | 1.7 – 2.3                              | 1.64E+00                     | -5.08E-03                     | -1.84E-03                       | 1.60E+00                     | -1.18E-02                     | -1.13E-03                       |
| 6       | 2.30 – 3.07                             | 2.3 – 3.0                              | 1.46E+00                     | 3.19E-02                      | -3.73E-02                       | 1.43E+00                     | 2.96E-02                      | -3.46E-02                       |

For each CR Box test, the particle loss rate was measured with OPC-1. For consistency, the test data were analysed starting at the time the particle concentration for bin 0 dropped below 26  $\text{p}/\text{cm}^3$  (per the OPC-1 measurement) for a period of 20 minutes. In 6 of 60 tests, there was not 20 minutes of data available after the concentration dropped below 26  $\text{p}/\text{cm}^3$ , and the available data (14-19 minutes) was used in these cases. The OPC-1 values were converted to corresponding APS values with Equation 2.

## Supplementary Information

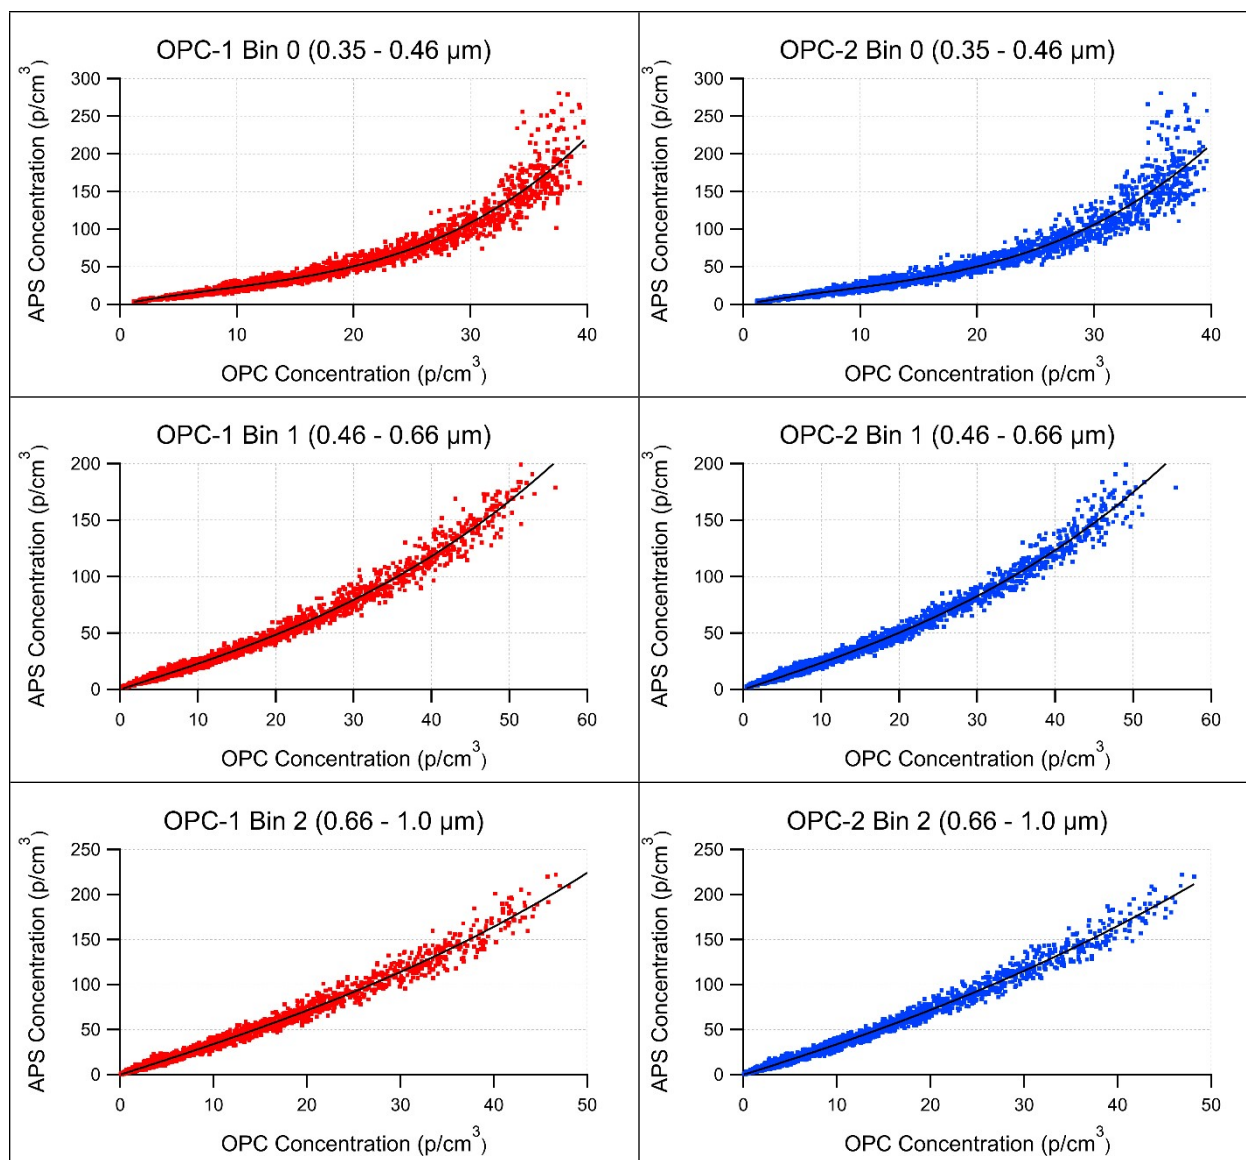

Figure S1: Empirical cubic correlations between low-cost OPC and laboratory grade APS data for bins 0 to 2 of the OPC. Coefficients for least-squares regression are contained in Table 2.

## Supplementary Information

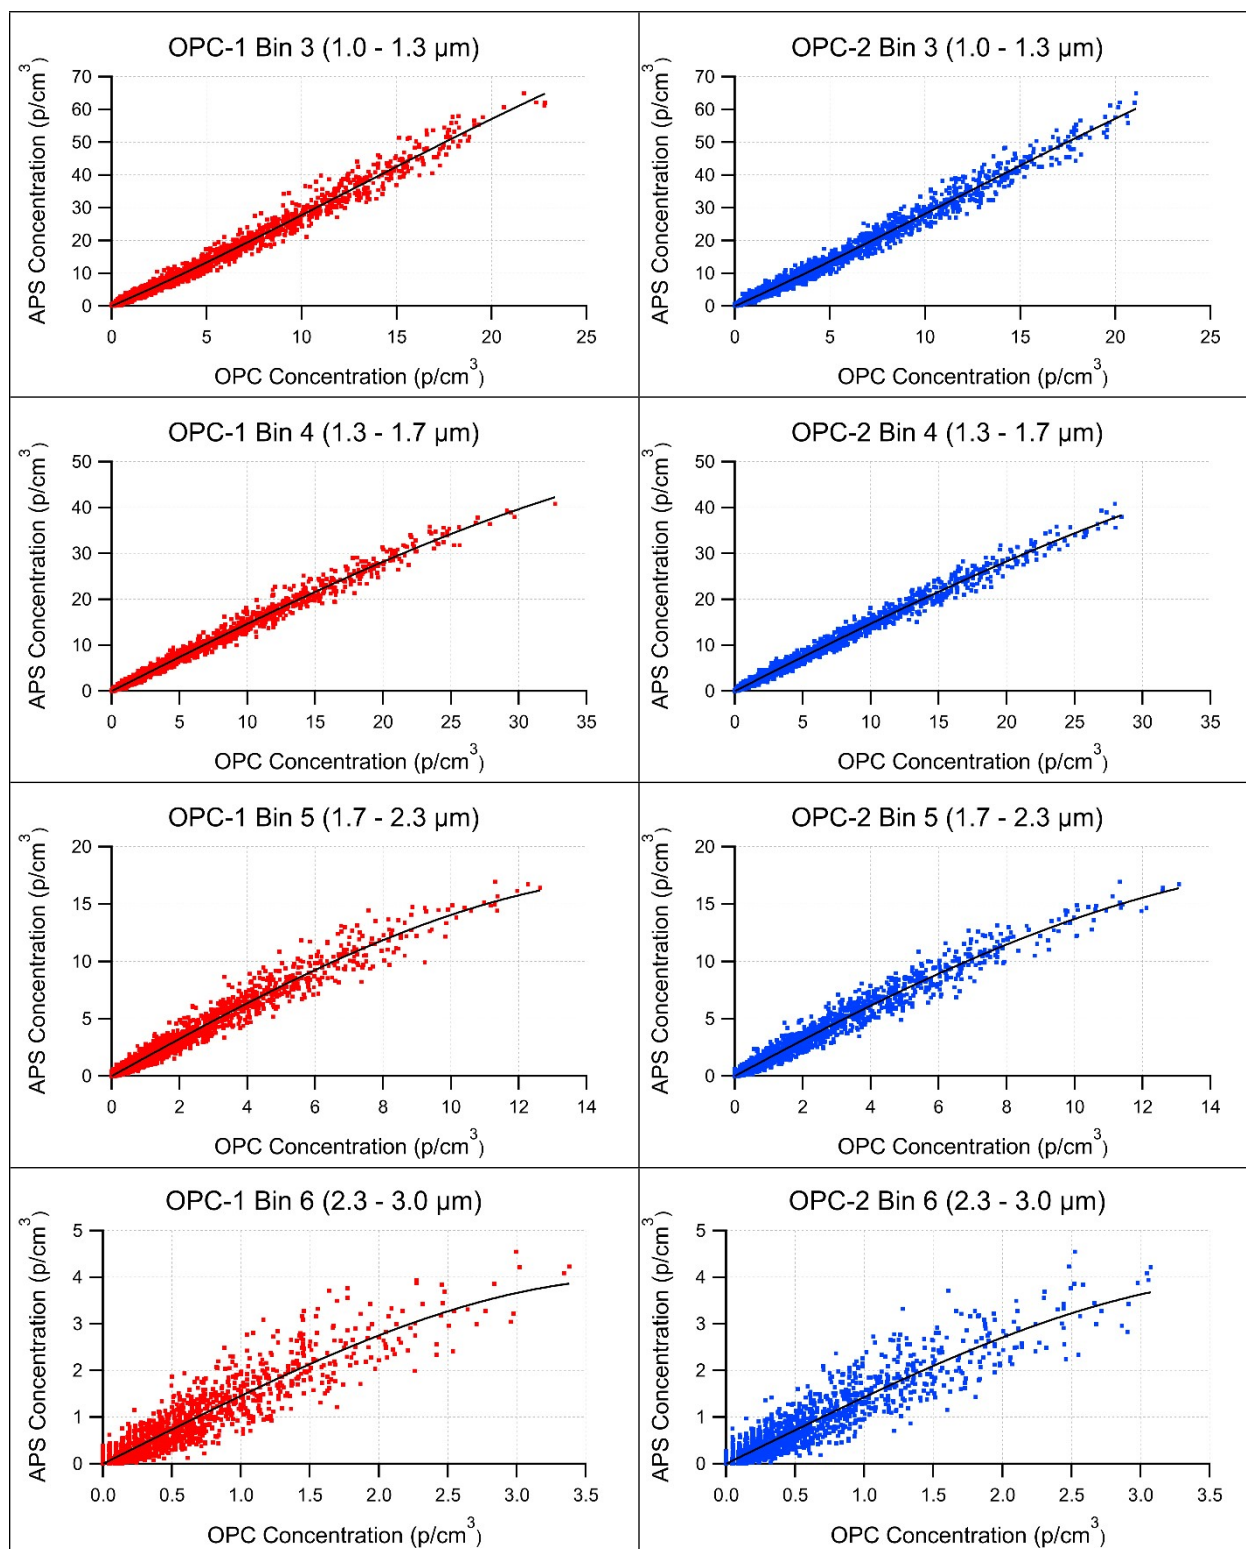

Figure S2: Empirical cubic correlations between low-cost OPC and laboratory grade APS data for bins 3 to 6 of the OPC. Coefficients for least-squares regression are contained in Table 2.

## Supplementary Information

### CADR Versus Cumulative Mass correlations

The fit coefficients for each box for CADR versus cumulative mass are shown in Table S2 and S3.

Table S2: Linear fit coefficients for Box 2, 3, and 4 from Figure 2 ( $y=K_0+K_1x$ )

| Size Range (um) | High Speed |            | Medium Speed |            | Low Speed |            |
|-----------------|------------|------------|--------------|------------|-----------|------------|
|                 | K0         | K1         | K0           | K1         | K0        | K1         |
| 0.35-1.0        | 8.034E+02  | -6.291E+01 | 6.834E+02    | -5.458E+01 | 5.301E+02 | -4.061E+01 |
| 1.0-3.0         | 1.101E+03  | -6.949E+01 | 8.865E+02    | -5.658E+01 | 6.891E+02 | -4.422E+01 |

Table S3: Quadratic fit coefficients for Box 1 from Figure 2 ( $y=K_0+K_1x+K_2x^2$ )

| Size Range (um) | High Speed |            |            | Medium Speed |           |            | Low Speed |           |            |
|-----------------|------------|------------|------------|--------------|-----------|------------|-----------|-----------|------------|
|                 | K0         | K1         | K2         | K0           | K1        | K2         | K0        | K1        | K2         |
| 0.35-1.0        | 1.187E+03  | -7.794E+00 | -2.411E+00 | 8.643E+02    | 2.658E+01 | -5.100E+00 | 6.834E+02 | 5.407E-01 | -2.767E+00 |
| 1.0-3.0         | 1.397E+03  | 2.102E+01  | -4.787E+00 | 9.694E+02    | 6.339E+01 | -8.314E+00 | 7.700E+02 | 1.521E+01 | -4.110E+00 |

### CADR Results Tables

CADR values for each bin with specified particle optical diameter range, as well as average CADR values presented in Figure 2, are shown for high speed (Table S4), medium speed (Table S5), and low speed (Table S6).

Table S4: CADR results for all CR boxes for high speed. CADR units are m<sup>3</sup>/hr.

| CR Box | Days Elapsed | 0.35 – 0.46 μm | 0.46 – 0.66 μm | 0.66 – 1.0 μm | 1.0 – 1.3 μm | 1.3 – 1.7 μm | 1.7 – 2.3 μm | 2.3 – 3.0 μm | Average 0.35 – 1.0 μm | Average 1.0 – 3.0 μm | Average 0.35 – 3.0 μm |
|--------|--------------|----------------|----------------|---------------|--------------|--------------|--------------|--------------|-----------------------|----------------------|-----------------------|
| 1      | 0            | 1109           | 1196           | 1244          | 1371         | 1366         | 1393         | 1415         | 1183                  | 1386                 | 1299                  |
| 1      | 70           | 933            | 1152           | 1284          | 1414         | 1381         | 1454         | 1563         | 1123                  | 1453                 | 1312                  |
| 1      | 140          | 858            | 1062           | 1120          | 1198         | 1259         | 1303         | 1293         | 1013                  | 1263                 | 1156                  |
| 1      | 210          | 710            | 968            | 1028          | 1099         | 1155         | 1174         | 1318         | 902                   | 1187                 | 1065                  |
| 1      | 280          | 753            | 943            | 1033          | 1103         | 1196         | 1199         | 1245         | 910                   | 1186                 | 1067                  |
| 2      | 0            | 734            | 870            | 970           | 1057         | 1096         | 1115         | 1159         | 858                   | 1106                 | 1000                  |
| 2      | 70           | 528            | 695            | 783           | 890          | 921          | 1002         | 1026         | 669                   | 960                  | 835                   |
| 2      | 140          | 472            | 574            | 673           | 742          | 816          | 858          | 1004         | 573                   | 855                  | 734                   |
| 2      | 210          | 516            | 612            | 678           | 761          | 785          | 851          | 902          | 602                   | 825                  | 729                   |
| 2      | 280          | 377            | 484            | 557           | 651          | 702          | 776          | 882          | 473                   | 753                  | 633                   |
| 3      | 0            | 785            | 917            | 1002          | 1118         | 1177         | 1361         | 1412         | 902                   | 1267                 | 1110                  |
| 3      | 70           | 617            | 836            | 892           | 989          | 1057         | 1058         | 1154         | 782                   | 1064                 | 943                   |
| 3      | 140          | 605            | 731            | 802           | 899          | 943          | 999          | 1077         | 712                   | 979                  | 865                   |
| 3      | 210          | 574            | 664            | 737           | 819          | 889          | 979          | 1067         | 659                   | 938                  | 818                   |
| 3      | 280          | 506            | 625            | 720           | 817          | 883          | 970          | 1060         | 617                   | 933                  | 798                   |
| 4      | 0            | 668            | 809            | 923           | 1011         | 1028         | 1150         | 1257         | 800                   | 1112                 | 978                   |
| 4      | 70           | 697            | 844            | 929           | 1008         | 1026         | 1047         | 1067         | 823                   | 1037                 | 945                   |
| 4      | 140          | 627            | 736            | 822           | 912          | 965          | 1013         | 1133         | 728                   | 1006                 | 887                   |
| 4      | 210          | 471            | 669            | 771           | 853          | 900          | 975          | 979          | 637                   | 927                  | 803                   |
| 4      | 280          | 513            | 634            | 722           | 841          | 890          | 1006         | 1220         | 623                   | 989                  | 832                   |

## Supplementary Information

Table S5: CADR results for all CR boxes for medium speed. CADR units are m<sup>3</sup>/hr.

| CR Box | Days Elapsed | 0.35 – 0.46 µm | 0.46 – 0.66 µm | 0.66 – 1.0 µm | 1.0 – 1.3 µm | 1.3 – 1.7 µm | 1.7 – 2.3 µm | 2.3 – 3.0 µm | Average 0.35 – 1.0 µm | Average 1.0 – 3.0 µm | Average 0.35 – 3.0 µm |
|--------|--------------|----------------|----------------|---------------|--------------|--------------|--------------|--------------|-----------------------|----------------------|-----------------------|
| 1      | 0            | 807            | 859            | 913           | 958          | 1002         | 1002         | 869          | 860                   | 958                  | 916                   |
| 1      | 70           | 788            | 925            | 996           | 1094         | 1128         | 1133         | 1216         | 903                   | 1143                 | 1040                  |
| 1      | 140          | 661            | 825            | 913           | 943          | 983          | 960          | 1003         | 800                   | 972                  | 898                   |
| 1      | 210          | 530            | 696            | 758           | 803          | 812          | 854          | 810          | 661                   | 820                  | 752                   |
| 1      | 280          | 577            | 703            | 753           | 818          | 861          | 845          | 934          | 678                   | 865                  | 784                   |
| 2      | 0            | 563            | 632            | 709           | 816          | 823          | 867          | 898          | 635                   | 851                  | 758                   |
| 2      | 70           | 469            | 561            | 637           | 703          | 736          | 804          | 836          | 555                   | 770                  | 678                   |
| 2      | 140          | 377            | 440            | 510           | 574          | 624          | 693          | 770          | 442                   | 665                  | 570                   |
| 2      | 210          | 398            | 486            | 549           | 601          | 620          | 686          | 705          | 478                   | 653                  | 578                   |
| 2      | 280          | 367            | 421            | 491           | 560          | 590          | 611          | 618          | 426                   | 595                  | 523                   |
| 3      | 0            | 649            | 786            | 818           | 919          | 948          | 992          | 973          | 751                   | 958                  | 869                   |
| 3      | 70           | 522            | 663            | 741           | 831          | 841          | 913          | 883          | 642                   | 867                  | 771                   |
| 3      | 140          | 457            | 560            | 633           | 692          | 727          | 787          | 751          | 550                   | 739                  | 658                   |
| 3      | 210          | 488            | 526            | 591           | 658          | 689          | 765          | 837          | 535                   | 737                  | 651                   |
| 3      | 280          | 502            | 570            | 654           | 743          | 783          | 895          | 867          | 575                   | 822                  | 716                   |
| 4      | 0            | 727            | 777            | 821           | 885          | 940          | 964          | 970          | 775                   | 940                  | 869                   |
| 4      | 70           | 649            | 705            | 758           | 828          | 858          | 873          | 837          | 704                   | 849                  | 787                   |
| 4      | 140          | 522            | 637            | 654           | 745          | 759          | 794          | 826          | 604                   | 781                  | 705                   |
| 4      | 210          | 567            | 656            | 710           | 765          | 804          | 837          | 912          | 644                   | 830                  | 750                   |
| 4      | 280          | 474            | 560            | 623           | 733          | 769          | 875          | 858          | 552                   | 808                  | 699                   |

Table S6: CADR results for all CR boxes for low speed. CADR units are m<sup>3</sup>/hr.

| CR Box | Days Elapsed | 0.35 – 0.46 µm | 0.46 – 0.66 µm | 0.66 – 1.0 µm | 1.0 – 1.3 µm | 1.3 – 1.7 µm | 1.7 – 2.3 µm | 2.3 – 3.0 µm | Average 0.35 – 1.0 µm | Average 1.0 – 3.0 µm | Average 0.35 – 3.0 µm |
|--------|--------------|----------------|----------------|---------------|--------------|--------------|--------------|--------------|-----------------------|----------------------|-----------------------|
| 1      | 0            | 632            | 683            | 719           | 768          | 797          | 761          | 704          | 678                   | 758                  | 724                   |
| 1      | 70           | 606            | 654            | 697           | 779          | 792          | 832          | 851          | 652                   | 814                  | 744                   |
| 1      | 140          | 453            | 575            | 646           | 684          | 686          | 603          | 621          | 558                   | 649                  | 610                   |
| 1      | 210          | 335            | 421            | 462           | 481          | 496          | 511          | 472          | 406                   | 490                  | 454                   |
| 1      | 280          | 494            | 497            | 534           | 566          | 581          | 613          | 601          | 508                   | 590                  | 555                   |
| 2      | 0            | 484            | 507            | 550           | 655          | 659          | 703          | 660          | 514                   | 669                  | 603                   |
| 2      | 70           | 426            | 477            | 514           | 601          | 616          | 639          | 779          | 472                   | 659                  | 579                   |
| 2      | 140          | 308            | 339            | 385           | 444          | 479          | 510          | 575          | 344                   | 502                  | 434                   |
| 2      | 210          | 401            | 416            | 459           | 500          | 523          | 522          | 530          | 425                   | 519                  | 479                   |
| 2      | 280          | 253            | 320            | 358           | 407          | 442          | 472          | 484          | 310                   | 451                  | 391                   |
| 3      | 0            | 632            | 683            | 719           | 768          | 797          | 761          | 704          | 678                   | 758                  | 724                   |
| 3      | 70           | 284            | 507            | 595           | 687          | 708          | 672          | 654          | 462                   | 680                  | 587                   |
| 3      | 140          | 374            | 420            | 471           | 522          | 554          | 620          | 605          | 421                   | 575                  | 509                   |
| 3      | 210          | 274            | 398            | 455           | 514          | 568          | 625          | 547          | 376                   | 563                  | 483                   |
| 3      | 280          | 277            | 399            | 480           | 517          | 573          | 674          | 667          | 385                   | 608                  | 512                   |
| 4      | 0            | 533            | 566            | 619           | 674          | 690          | 714          | 753          | 573                   | 708                  | 650                   |
| 4      | 70           | 502            | 566            | 606           | 678          | 681          | 726          | 709          | 558                   | 698                  | 638                   |
| 4      | 140          | 430            | 462            | 499           | 540          | 572          | 615          | 612          | 463                   | 584                  | 533                   |
| 4      | 210          | 487            | 514            | 560           | 615          | 612          | 628          | 564          | 520                   | 605                  | 568                   |
| 4      | 280          | 340            | 434            | 490           | 569          | 599          | 679          | 707          | 422                   | 639                  | 546                   |

## Supplementary Information

### SPFE Results Tables

SPFE values for each bin with specified particle optical diameter range, as well as average SPFE values presented in Figure 4, are shown for high speed (Table S7), medium speed (Table S8), and low speed (Table S9).

Table S7: SPFE results for all CR boxes for high speed. SPFE is a unitless ratio.

| CR Box | Days Elapsed | 0.35 – 0.46 $\mu\text{m}$ | 0.46 – 0.66 $\mu\text{m}$ | 0.66 – 1.0 $\mu\text{m}$ | 1.0 – 1.3 $\mu\text{m}$ | 1.3 – 1.7 $\mu\text{m}$ | 1.7 – 2.3 $\mu\text{m}$ | 2.3 – 3.0 $\mu\text{m}$ | Average 0.35 – 1.0 $\mu\text{m}$ | Average 1.0 – 3.0 $\mu\text{m}$ | Average 0.35 – 3.0 $\mu\text{m}$ |
|--------|--------------|---------------------------|---------------------------|--------------------------|-------------------------|-------------------------|-------------------------|-------------------------|----------------------------------|---------------------------------|----------------------------------|
| 1      | 0            | 0.98                      | 0.99                      | 1.00                     | 1.00                    | 1.00                    | 1.00                    | 1.00                    | 0.99                             | 1.00                            | 0.99                             |
| 1      | 210          | 0.72                      | 0.87                      | 0.91                     | 0.92                    | 0.93                    | 0.94                    | 0.96                    | 0.83                             | 0.94                            | 0.89                             |
| 1      | 280          | 0.67                      | 0.83                      | 0.88                     | 0.89                    | 0.91                    | 0.94                    | 0.95                    | 0.79                             | 0.92                            | 0.87                             |
| 2      | 0            | 0.69                      | 0.72                      | 0.78                     | 0.84                    | 0.86                    | 0.86                    | 0.90                    | 0.73                             | 0.87                            | 0.81                             |
| 2      | 210          | 0.41                      | 0.47                      | 0.50                     | 0.52                    | 0.58                    | 0.57                    | 0.59                    | 0.46                             | 0.57                            | 0.52                             |
| 2      | 280          | 0.20                      | 0.29                      | 0.40                     | 0.39                    | 0.40                    | 0.45                    | 0.41                    | 0.30                             | 0.41                            | 0.36                             |
| 3      | 0            | 0.72                      | 0.73                      | 0.78                     | 0.82                    | 0.82                    | 0.83                    | 0.88                    | 0.74                             | 0.84                            | 0.80                             |
| 3      | 210          | 0.44                      | 0.56                      | 0.61                     | 0.64                    | 0.65                    | 0.64                    | 0.70                    | 0.53                             | 0.66                            | 0.61                             |
| 3      | 280          | 0.36                      | 0.45                      | 0.55                     | 0.60                    | 0.60                    | 0.70                    | 0.68                    | 0.45                             | 0.65                            | 0.56                             |
| 4      | 0            | 0.64                      | 0.67                      | 0.72                     | 0.75                    | 0.78                    | 0.80                    | 0.87                    | 0.68                             | 0.80                            | 0.75                             |
| 4      | 210          | 0.39                      | 0.56                      | 0.61                     | 0.61                    | 0.68                    | 0.66                    | 0.72                    | 0.52                             | 0.67                            | 0.60                             |
| 4      | 280          | 0.29                      | 0.41                      | 0.49                     | 0.49                    | 0.52                    | 0.65                    | 0.56                    | 0.40                             | 0.56                            | 0.49                             |

Table S8: SPFE results for all CR boxes for medium speed. SPFE is a unitless ratio.

| CR Box | Days Elapsed | 0.35 – 0.46 $\mu\text{m}$ | 0.46 – 0.66 $\mu\text{m}$ | 0.66 – 1.0 $\mu\text{m}$ | 1.0 – 1.3 $\mu\text{m}$ | 1.3 – 1.7 $\mu\text{m}$ | 1.7 – 2.3 $\mu\text{m}$ | 2.3 – 3.0 $\mu\text{m}$ | Average 0.35 – 1.0 $\mu\text{m}$ | Average 1.0 – 3.0 $\mu\text{m}$ | Average 0.35 – 3.0 $\mu\text{m}$ |
|--------|--------------|---------------------------|---------------------------|--------------------------|-------------------------|-------------------------|-------------------------|-------------------------|----------------------------------|---------------------------------|----------------------------------|
| 1      | 0            | 0.98                      | 0.99                      | 1.00                     | 1.00                    | 1.00                    | 1.00                    | 1.00                    | 0.99                             | 1.00                            | 0.99                             |
| 1      | 210          | 0.72                      | 0.87                      | 0.91                     | 0.92                    | 0.93                    | 0.94                    | 0.96                    | 0.83                             | 0.94                            | 0.89                             |
| 1      | 280          | 0.67                      | 0.83                      | 0.88                     | 0.89                    | 0.91                    | 0.94                    | 0.95                    | 0.79                             | 0.92                            | 0.87                             |
| 2      | 0            | 0.69                      | 0.72                      | 0.78                     | 0.84                    | 0.86                    | 0.86                    | 0.90                    | 0.73                             | 0.87                            | 0.81                             |
| 2      | 210          | 0.41                      | 0.47                      | 0.50                     | 0.52                    | 0.58                    | 0.57                    | 0.59                    | 0.46                             | 0.57                            | 0.52                             |
| 2      | 280          | 0.20                      | 0.29                      | 0.40                     | 0.39                    | 0.40                    | 0.45                    | 0.41                    | 0.30                             | 0.41                            | 0.36                             |
| 3      | 0            | 0.72                      | 0.73                      | 0.78                     | 0.82                    | 0.82                    | 0.83                    | 0.88                    | 0.74                             | 0.84                            | 0.80                             |
| 3      | 210          | 0.44                      | 0.56                      | 0.61                     | 0.64                    | 0.65                    | 0.64                    | 0.70                    | 0.53                             | 0.66                            | 0.61                             |
| 3      | 280          | 0.36                      | 0.45                      | 0.55                     | 0.60                    | 0.60                    | 0.70                    | 0.68                    | 0.45                             | 0.65                            | 0.56                             |
| 4      | 0            | 0.64                      | 0.67                      | 0.72                     | 0.75                    | 0.78                    | 0.80                    | 0.87                    | 0.68                             | 0.80                            | 0.75                             |
| 4      | 210          | 0.39                      | 0.56                      | 0.61                     | 0.61                    | 0.68                    | 0.66                    | 0.72                    | 0.52                             | 0.67                            | 0.60                             |
| 4      | 280          | 0.29                      | 0.41                      | 0.49                     | 0.49                    | 0.52                    | 0.65                    | 0.56                    | 0.40                             | 0.56                            | 0.49                             |

## Supplementary Information

Table S9: SPFE results for all CR boxes for low speed. SPFE is a unitless ratio.

| CR Box | Days Elapsed | 0.35 – 0.46 $\mu\text{m}$ | 0.46 – 0.66 $\mu\text{m}$ | 0.66 – 1.0 $\mu\text{m}$ | 1.0 – 1.3 $\mu\text{m}$ | 1.3 – 1.7 $\mu\text{m}$ | 1.7 – 2.3 $\mu\text{m}$ | 2.3 – 3.0 $\mu\text{m}$ | Average 0.35 – 1.0 $\mu\text{m}$ | Average 1.0 – 3.0 $\mu\text{m}$ | Average 0.35 – 3.0 $\mu\text{m}$ |
|--------|--------------|---------------------------|---------------------------|--------------------------|-------------------------|-------------------------|-------------------------|-------------------------|----------------------------------|---------------------------------|----------------------------------|
| 1      | 0            | 0.99                      | 1.00                      | 1.00                     | 1.00                    | 1.00                    | 1.00                    | 1.00                    | 0.99                             | 1.00                            | 1.00                             |
| 1      | 210          | 0.77                      | 0.91                      | 0.94                     | 0.95                    | 0.96                    | 0.98                    | 0.95                    | 0.87                             | 0.96                            | 0.92                             |
| 1      | 280          | 0.73                      | 0.87                      | 0.91                     | 0.93                    | 0.94                    | 0.94                    | 0.95                    | 0.84                             | 0.94                            | 0.90                             |
| 2      | 0            | 0.64                      | 0.70                      | 0.75                     | 0.82                    | 0.81                    | 0.83                    | 0.82                    | 0.70                             | 0.82                            | 0.77                             |
| 2      | 210          | 0.39                      | 0.49                      | 0.52                     | 0.56                    | 0.62                    | 0.63                    | 0.61                    | 0.47                             | 0.61                            | 0.55                             |
| 2      | 280          | 0.24                      | 0.30                      | 0.38                     | 0.43                    | 0.39                    | 0.50                    | 0.55                    | 0.31                             | 0.46                            | 0.40                             |
| 3      | 0            | 0.69                      | 0.75                      | 0.79                     | 0.81                    | 0.82                    | 0.84                    | 0.87                    | 0.75                             | 0.83                            | 0.80                             |
| 3      | 210          | 0.42                      | 0.59                      | 0.65                     | 0.68                    | 0.67                    | 0.69                    | 0.70                    | 0.55                             | 0.69                            | 0.63                             |
| 3      | 280          | 0.36                      | 0.49                      | 0.55                     | 0.57                    | 0.63                    | 0.63                    | 0.69                    | 0.47                             | 0.63                            | 0.56                             |
| 4      | 0            | 0.62                      | 0.71                      | 0.76                     | 0.80                    | 0.80                    | 0.82                    | 0.85                    | 0.70                             | 0.82                            | 0.77                             |
| 4      | 210          | 0.39                      | 0.59                      | 0.64                     | 0.66                    | 0.68                    | 0.73                    | 0.77                    | 0.54                             | 0.71                            | 0.64                             |
| 4      | 280          | 0.28                      | 0.42                      | 0.48                     | 0.57                    | 0.52                    | 0.59                    | 0.73                    | 0.39                             | 0.60                            | 0.51                             |

### Total Flow Rate Results Tables

Total flow rate for each bin with specified particle optical diameter range, as well as average flow rate and standard deviation values presented in Figure 5, are shown for high speed (Table S10), medium speed (Table S11), and low speed (Table S12).

Table S10: Total flow rate results for all CR boxes for high speed. Flow rate units are  $\text{m}^3/\text{hr}$ .

| CR Box | Days Elapsed | 0.35 – 0.46 $\mu\text{m}$ | 0.46 – 0.66 $\mu\text{m}$ | 0.66 – 1.0 $\mu\text{m}$ | 1.0 – 1.3 $\mu\text{m}$ | 1.3 – 1.7 $\mu\text{m}$ | 1.7 – 2.3 $\mu\text{m}$ | 2.3 – 3.0 $\mu\text{m}$ | Average 0.35 – 3.0 $\mu\text{m}$ | Standard Deviation 0.35– 3.0 $\mu\text{m}$ |
|--------|--------------|---------------------------|---------------------------|--------------------------|-------------------------|-------------------------|-------------------------|-------------------------|----------------------------------|--------------------------------------------|
| 1      | 0            | 1083                      | 1132                      | 1165                     | 1278                    | 1261                    | 1276                    | 1275                    | 1210                             | 58                                         |
| 1      | 210          | 917                       | 1027                      | 1044                     | 1088                    | 1123                    | 1128                    | 1228                    | 1079                             | 66                                         |
| 1      | 280          | 1049                      | 1057                      | 1079                     | 1129                    | 1200                    | 1147                    | 1166                    | 1118                             | 47                                         |
| 2      | 0            | 999                       | 1109                      | 1132                     | 1141                    | 1153                    | 1154                    | 1125                    | 1116                             | 23                                         |
| 2      | 210          | 1132                      | 1142                      | 1187                     | 1276                    | 1163                    | 1279                    | 1283                    | 1209                             | 56                                         |
| 2      | 280          | 1628                      | 1438                      | 1178                     | 1429                    | 1491                    | 1452                    | 1795                    | 1487                             | 168                                        |
| 3      | 0            | 1021                      | 1165                      | 1174                     | 1248                    | 1307                    | 1489                    | 1442                    | 1264                             | 121                                        |
| 3      | 210          | 1206                      | 1063                      | 1074                     | 1123                    | 1199                    | 1338                    | 1325                    | 1190                             | 103                                        |
| 3      | 280          | 1276                      | 1242                      | 1168                     | 1199                    | 1287                    | 1217                    | 1361                    | 1250                             | 59                                         |
| 4      | 0            | 966                       | 1100                      | 1158                     | 1218                    | 1176                    | 1282                    | 1286                    | 1169                             | 69                                         |
| 4      | 210          | 1093                      | 1066                      | 1135                     | 1234                    | 1175                    | 1293                    | 1170                    | 1167                             | 67                                         |
| 4      | 280          | 1602                      | 1378                      | 1310                     | 1510                    | 1503                    | 1370                    | 1930                    | 1515                             | 191                                        |

## Supplementary Information

Table S11: Total flow rate results for all CR boxes for medium speed. Flow rate units are m<sup>3</sup>/hr.

| CR Box | Days Elapsed | 0.35 – 0.46 µm | 0.46 – 0.66 µm | 0.66 – 1.0 µm | 1.0 – 1.3 µm | 1.3 – 1.7 µm | 1.7 – 2.3 µm | 2.3 – 3.0 µm | Average 0.35 – 3.0 µm | Standard Deviation 0.35– 3.0 µm |
|--------|--------------|----------------|----------------|---------------|--------------|--------------|--------------|--------------|-----------------------|---------------------------------|
| 1      | 0            | 791            | 812            | 853           | 886          | 920          | 908          | 742          | 845                   | 58                              |
| 1      | 210          | 673            | 723            | 744           | 770          | 767          | 805          | 704          | 741                   | 32                              |
| 1      | 280          | 783            | 768            | 778           | 830          | 835          | 794          | 827          | 802                   | 24                              |
| 2      | 0            | 728            | 732            | 762           | 853          | 826          | 860          | 831          | 799                   | 45                              |
| 2      | 210          | 999            | 929            | 939           | 949          | 942          | 952          | 934          | 949                   | 11                              |
| 2      | 280          | 1481           | 1206           | 1083          | 1177         | 1185         | 1125         | 1117         | 1196                  | 59                              |
| 3      | 0            | 883            | 998            | 962           | 1035         | 1048         | 1076         | 972          | 996                   | 42                              |
| 3      | 210          | 1024           | 837            | 852           | 896          | 887          | 943          | 1015         | 922                   | 58                              |
| 3      | 280          | 1415           | 1112           | 1069          | 1154         | 1206         | 1220         | 1218         | 1199                  | 63                              |
| 4      | 0            | 1083           | 1045           | 1012          | 1032         | 1086         | 1060         | 1002         | 1046                  | 27                              |
| 4      | 210          | 1458           | 1066           | 1009          | 1095         | 1097         | 1056         | 1104         | 1126                  | 59                              |
| 4      | 280          | 1676           | 1229           | 1141          | 1248         | 1307         | 1288         | 1209         | 1300                  | 77                              |

Table S12: Total flow rate results for all CR boxes for low speed. Flow rate units are m<sup>3</sup>/hr.

| CR Box | Days Elapsed | 0.35 – 0.46 µm | 0.46 – 0.66 µm | 0.66 – 1.0 µm | 1.0 – 1.3 µm | 1.3 – 1.7 µm | 1.7 – 2.3 µm | 2.3 – 3.0 µm | Average 0.35 – 3.0 µm | Standard Deviation 0.35– 3.0 µm |
|--------|--------------|----------------|----------------|---------------|--------------|--------------|--------------|--------------|-----------------------|---------------------------------|
| 1      | 0            | 601            | 624            | 650           | 689          | 709          | 666          | 600          | 649                   | 35                              |
| 1      | 210          | 391            | 395            | 417           | 421          | 424          | 426          | 386          | 408                   | 14                              |
| 1      | 280          | 628            | 497            | 511           | 522          | 525          | 549          | 523          | 536                   | 20                              |
| 2      | 0            | 701            | 632            | 640           | 700          | 705          | 734          | 674          | 684                   | 34                              |
| 2      | 210          | 939            | 718            | 740           | 747          | 696          | 676          | 703          | 745                   | 38                              |
| 2      | 280          | 901            | 864            | 751           | 766          | 912          | 756          | 695          | 806                   | 70                              |
| 3      | 0            | 684            | 34             | 861           | 826          | 820          | 846          | 865          | 815                   | 53                              |
| 3      | 210          | 745            | 38             | 568           | 567          | 594          | 635          | 714          | 640                   | 64                              |
| 3      | 280          | 806            | 70             | 677           | 686          | 740          | 768          | 770          | 769                   | 70                              |
| 4      | 0            | 796            | 711            | 724           | 743          | 752          | 750          | 763          | 749                   | 18                              |
| 4      | 210          | 1150           | 770            | 759           | 813          | 768          | 732          | 598          | 799                   | 83                              |
| 4      | 280          | 1082           | 890            | 870           | 858          | 983          | 986          | 822          | 927                   | 62                              |



## Supplementary Information

### Raw Power Data

The complete set of power monitoring data is shown in Figure S3. As explained in the main text, the power meter for Box 2 did not log data for the last deployment period. Periodic observations of the box recorded that it was running at low speed as expected during this period.

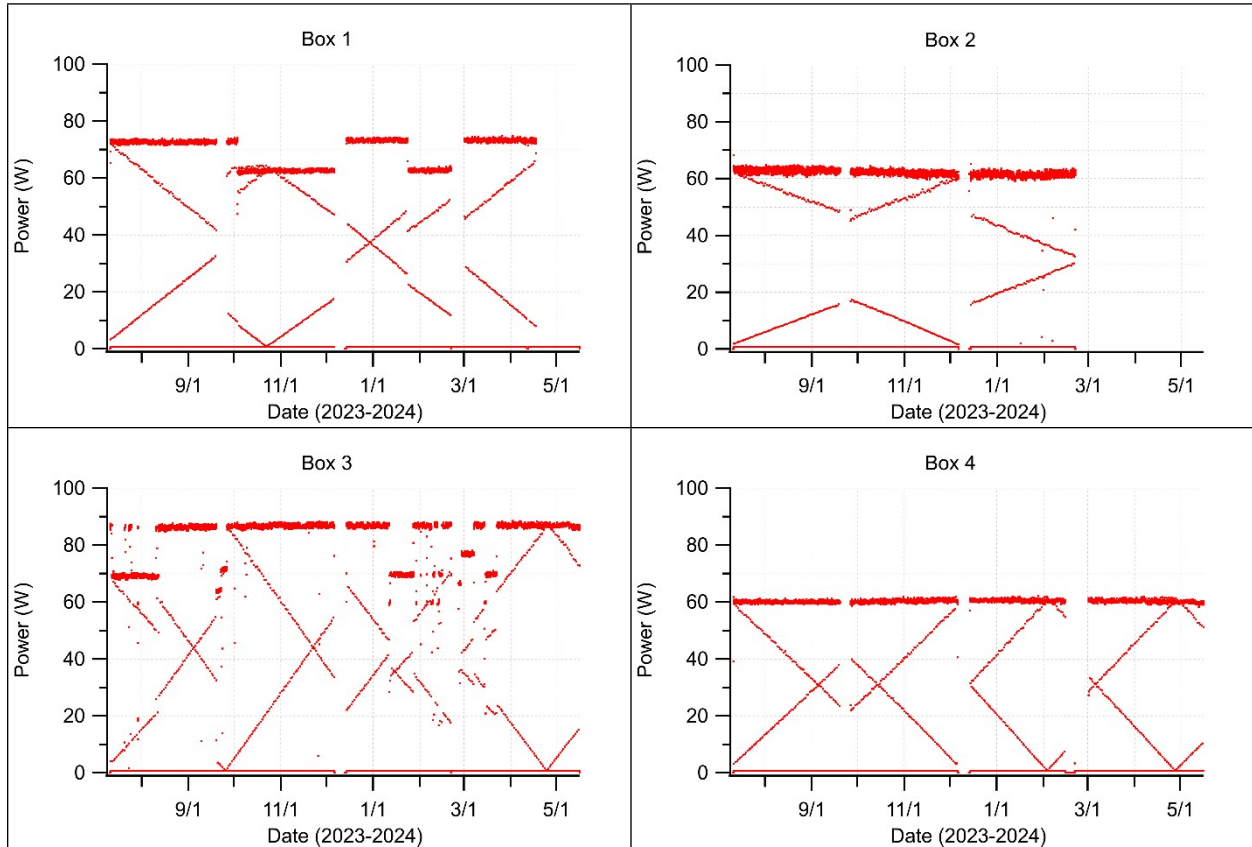

Figure S3: All power motoring data for CR Boxes 1 to 4. Each steady state power level indicates distinct fan speed (only Box 1 and Box 3 were used at multiple speeds by the occupants).

### Pressure Drop Data

The differential pressure measurements for each CR box at each speed are shown in Table S13.

Table S13: Pressure differential across CR Box filters by box, speed, and days elapsed

| Days Elapsed | High Speed |            |            |            | Medium Speed |            |            |            | Low Speed  |            |            |            |
|--------------|------------|------------|------------|------------|--------------|------------|------------|------------|------------|------------|------------|------------|
|              | Box 1 (Pa) | Box 2 (Pa) | Box 3 (Pa) | Box 4 (Pa) | Box 1 (Pa)   | Box 2 (Pa) | Box 3 (Pa) | Box 4 (Pa) | Box 1 (Pa) | Box 2 (Pa) | Box 3 (Pa) | Box 4 (Pa) |
| 0            | 7.2        | 7.2        | 7.1        | 7.2        | 5.4          | 5.6        | 5.7        | 5.7        | 4.0        | 4.1        | 4.2        | 4.2        |
| 210          | 10.3       | 8.2        | 8.6        | 8.7        | 6.7          | 5.5        | 6.2        | 6.0        | 5.7        | 4.4        | 4.9        | 4.8        |
| 280          | 10.9       | 8.2        | 8.9        | 9          | 8.1          | 6.2        | 7          | 7.2        | 5.7        | 4.6        | 5.1        | 5.2        |

## Supplementary Information

### CADR Measurement Uncertainty

To estimate the uncertainty of the CADR measurement method, at the end of the experiment the CADR of Box 3 on speed high was measured 10 times (Table S14). Box 3 had been used intermittently over two months since testing concluded, so the results are slightly lower than the 40-week measurement. The uncertainty (two standard deviations) was 6% of the average measurement for 0.35 to 1  $\mu\text{m}$  optical diameter particles and 5% for 1 to 3 optical diameter particles.

Table S14: Repeat CADR measurement for Box 3 for medium speed. CADR units are  $\text{m}^3/\text{hr}$ .

| Test | 0.35 –<br>0.46 $\mu\text{m}$ | 0.46 –<br>0.66 $\mu\text{m}$ | 0.66 –<br>1.0 $\mu\text{m}$ | 1.0 – 1.3<br>$\mu\text{m}$ | 1.3 – 1.7<br>$\mu\text{m}$ | 1.7 – 2.3<br>$\mu\text{m}$ | 2.3 – 3.0<br>$\mu\text{m}$ | Average<br>0.35 –<br>1.0 $\mu\text{m}$ | Average<br>1.0 – 3.0<br>$\mu\text{m}$ |     |
|------|------------------------------|------------------------------|-----------------------------|----------------------------|----------------------------|----------------------------|----------------------------|----------------------------------------|---------------------------------------|-----|
| 1    | 389                          | 613                          | 707                         | 807                        | 874                        | 926                        | 1014                       | 570                                    | 905                                   |     |
| 2    | 459                          | 604                          | 674                         | 770                        | 791                        | 883                        | 940                        | 579                                    | 846                                   |     |
| 3    | 464                          | 604                          | 686                         | 767                        | 815                        | 880                        | 1022                       | 585                                    | 871                                   |     |
| 4    | 449                          | 612                          | 694                         | 767                        | 834                        | 902                        | 1028                       | 585                                    | 883                                   |     |
| 5    | 477                          | 614                          | 690                         | 780                        | 824                        | 931                        | 937                        | 594                                    | 868                                   |     |
| 6    | 393                          | 582                          | 661                         | 736                        | 814                        | 917                        | 948                        | 545                                    | 854                                   |     |
| 7    | 447                          | 585                          | 668                         | 746                        | 818                        | 903                        | 1008                       | 567                                    | 869                                   |     |
| 8    | 458                          | 596                          | 678                         | 769                        | 797                        | 923                        | 976                        | 577                                    | 866                                   |     |
| 9    | 394                          | 607                          | 683                         | 775                        | 818                        | 842                        | 898                        | 562                                    | 833                                   |     |
| 10   | 489                          | 626                          | 697                         | 821                        | 845                        | 879                        | 971                        | 604                                    | 879                                   |     |
|      |                              |                              |                             |                            |                            |                            |                            | Average                                | 577                                   | 867 |
|      |                              |                              |                             |                            |                            |                            |                            | 2*STD                                  | 34                                    | 40  |
|      |                              |                              |                             |                            |                            |                            |                            | Percent                                | 6%                                    | 5%  |
